# Supplementary material
Source: PubMed Central journal article supplement (PMC3356637)
Supplement: 1201997109_pnas.201201997SI.pdf [file 1201997109_pnas.201201997SI.pdf]

# Supporting Information

Bankston et al. 10.1073/pnas.1201997109

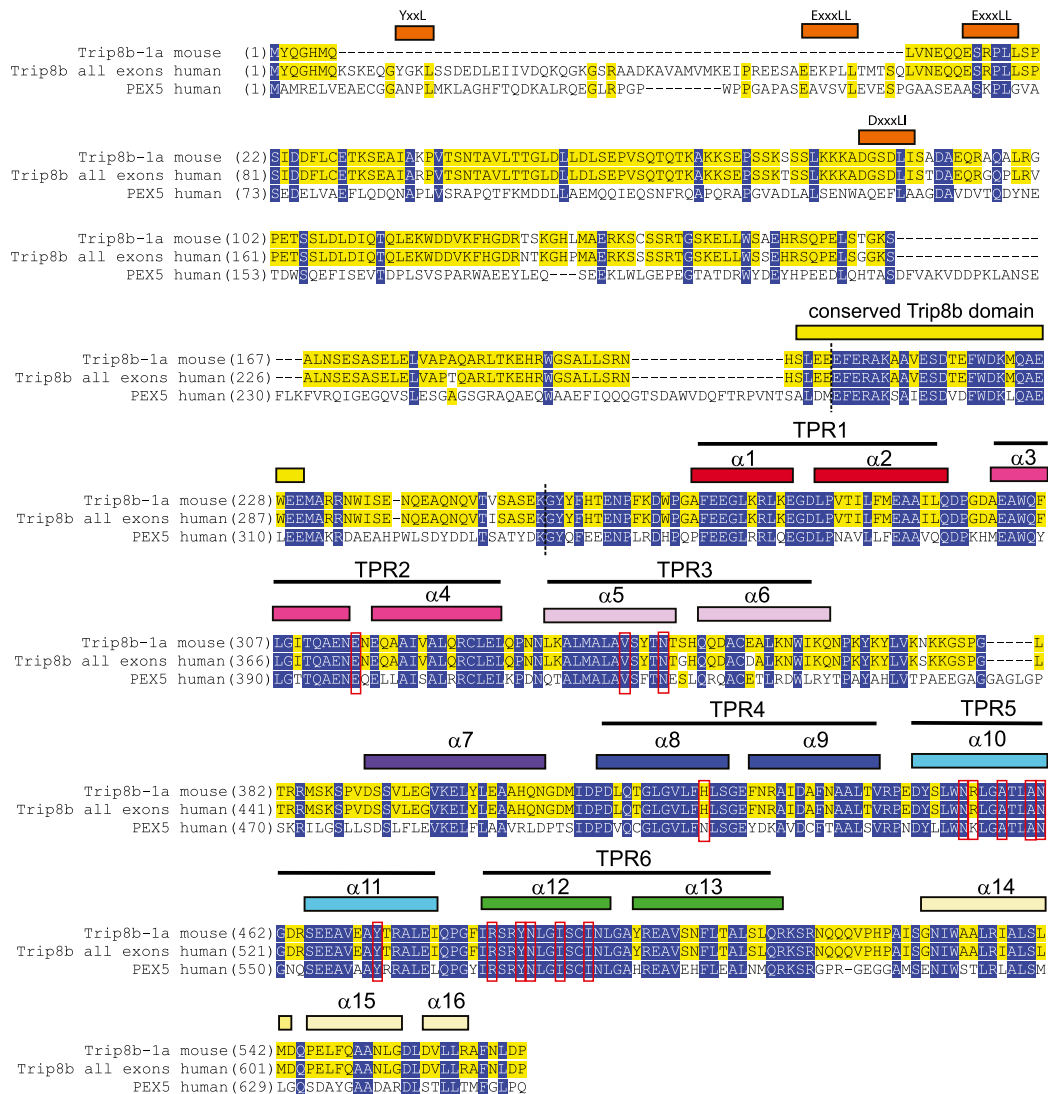

**Fig. S1.** Sequence alignment of tetratricopeptide repeat-containing Rab8b-interacting protein TRIP8b and the related protein peroxin-5 (PEX5). The numbering system in this study is based on isoform TRIP8b-1a (top row). The second row shows the sequence of all potential exons of TRIP8b and does not represent a real protein. The bottom row shows the sequence of the related PEX5 protein. Orange bars denote four trafficking motifs that are known to recruit distinct sets of proteins involved in membrane protein trafficking. The yellow bar denotes the TRIP8b conserved domain, a region that is 100% conserved in all orthologs of TRIP8b, which is thought to be involved in binding to the cyclic nucleotide-binding domain of hyperpolarization-activated cyclic nucleotide-gated channels. The remaining colored bars denote the helices found in the X-ray crystal structure, and the colors match the color scheme in Fig. 4A. Dashed lines denote the start of the TRIP8b-1aΔ1-205 and TRIP8b-1aΔ1-254 proteins.

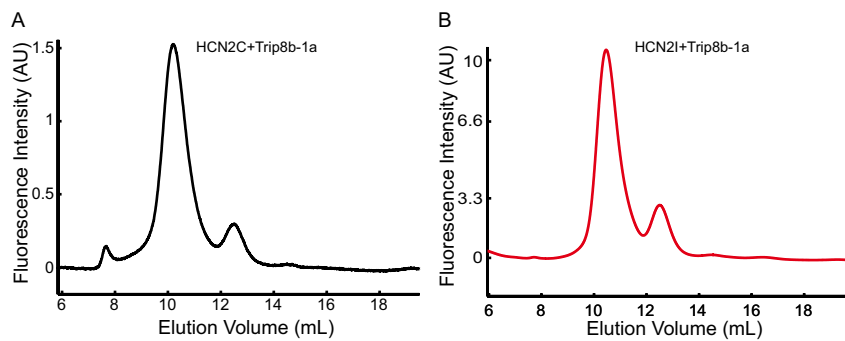

**Fig. S2.** TRIP8b-1a/HCN2 remains intact after affinity purification. (A) Fluorescence-detection size-exclusion chromatography (FSEC) results for the TRIP8b-1a/HCN2C complex after purification on a  $\text{Ni}^{2+}$  column and removal of the EGFP and histidine tags. A fluorescence signal, excited at 280 nm and measured at 350 nm, arises from the tryptophans present in TRIP8b-1a. The peak at 10.2 mL corresponds to the peak that represents the complex, and the smaller peak at 12.5 mL corresponds to a small fraction of unbound TRIP8b-1a. No peak for HCN2C is seen because there are no tryptophans in the protein. (B) FSEC results for the TRIP8b-1a/HCN2I complex after purification on a  $\text{Ni}^{2+}$  column and removal of the EGFP and histidine tags. The peak at 10.4 mL corresponds to the peak that represents the complex, and the smaller peak at 12.7 mL corresponds to a small fraction of unbound TRIP8b-1a.

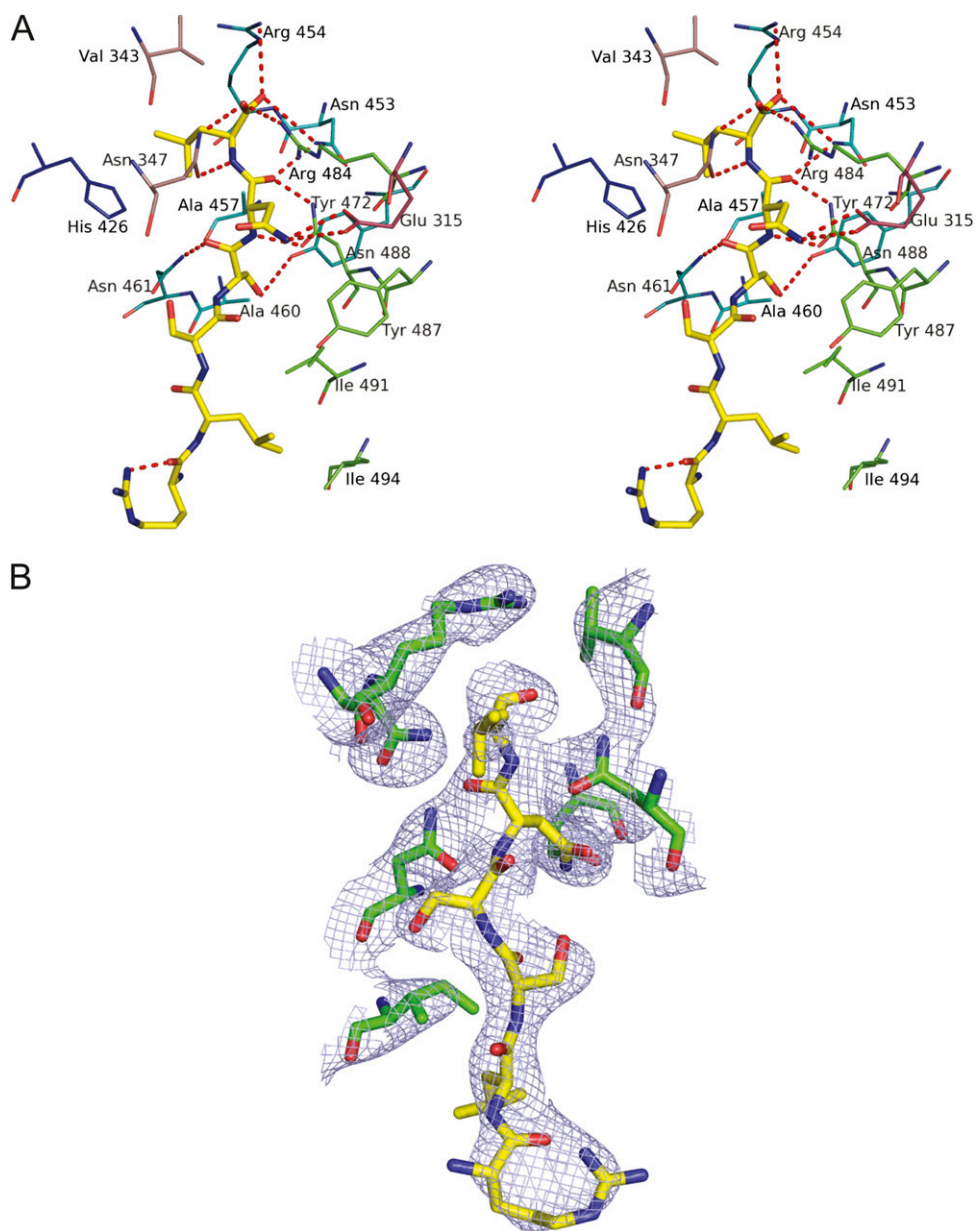

**Fig. S3.** (A) Stereoview of the major residues involved in the binding site for TRIP8b and HCN2. The HCN2 peptide is rendered as sticks and colored by element, and the residues on TRIP8b are rendered as lines and colored by elements. The colors of the carbons on TRIP8b match the color scheme of the ribbon representation in Fig. 4A. Polar contacts are shown as dashed red lines. (B) 2Fo-Fc "omit" map of the HCN2 peptide and some of the interacting residues on Trip8b.
